# Supplementary material for: Shifting the HIV Paradigm from Care to Cure: Proceedings from the Caribbean Expert Summit in Barbados, August 2017
Source: PubMed Central journal article supplement (PMC6053839; doi:10.1089/aid.2017.0310), 2018-07-01
Supplement: Supp_Data.pdf [file Supp_Data.pdf]

## Supplementary Data

### **CCAS EXPERT SUMMIT: From Care to Cure— Shifting the HIV Paradigm**

**Almond Beach Hotel, St. Peter, Barbados**

**August 27–31, 2017**

**Sunday August 27, 2017**

#### **Opening Ceremony**

Master of Ceremonies: Vera Layne, President, Caribbean  
Cytometry & Analytical Society (CCAS)

6:30 pm: National Anthem of Barbados

6:35 pm: Opening Prayer

6:40 pm: Welcome: Clive Landis, Chairman, CCAS,  
Barbados

6:50 pm: Greetings: Barbados Ministry of Health—Anton Best

7:00 pm: Remarks: UNAIDS Latin America and the Ca-  
ribbean—Cesar Nunez

7:10 pm: CCAS DISTINGUISHED LECTURE: Social  
and economic vulnerability of women: a nexus of risk—  
Deanna Kerrigan, Baltimore, USA

7:50 pm: Vote of Thanks: Valerie Wilson, Caribbean  
MedLabs Foundation

8:00 pm: Entertainment/cocktails

**Monday August 28, 2017**

#### **Expert Summit Session 1**

Chair: Clive Landis

8:30 am: A bumpy journey: from lipodystrophy to PrEP—  
Réjean Thomas, Montreal, Canada

9:15 am: CD4: a marker in time—George Janossy, Lon-  
don, United Kingdom

**Coffee break 10:00–10:30 am**

#### **Expert Summit Session 2**

Chair: Eric van Gorp

10:30 am: An explosion of technology innovation ... dri-  
ven from the South—Phil McCoy, NIH, USA

11:15 am: Quality diagnostics at the point of care—Bharat  
Parekh, CDC, USA

**Lunch 12:00–1:00 pm**

#### **Expert Summit Session 3**

Chair: Réjean Thomas

1:00 pm: Treatment as prevention: is anyone watching?—  
Thomas Quinn, Baltimore, USA

1:45 pm: Treatment as prevention a decade later: “The sci-  
entific discovery of the year”—Sten Vermund, Nashville, USA

**Tea break 2:30–3:00 am**

#### **Expert Summit Session 4**

Chair: George Janossy

3:00 pm: A generation of children without HIV: dream or  
reality?—Mo O’Gorman, Los Angeles, USA

3:45 pm: An opportunity to recast the HIV message on  
stigma and discrimination: the self-interest theory—Clive  
Landis, The University of the West Indies, Barbados

**Tuesday August 29, 2017**

#### **Expert Summit Session 5**

Chair: Mo O’Gorman

8:30 am: Mind over matter: challenges in neurocognition—  
Kevin Robertson, Chapel Hill, USA

9:15 am: Against all odds: Haiti leads the way—Patrice  
Joseph, Port-au-Prince, Haiti

**Coffee break 10:00–10:30 am**

#### **Expert Summit Session 6**

Chair: Patrice Joseph

10:30 am: Achieving the 90-90-90 targets in Latin  
America and the Caribbean progress and challenges—Cesar  
Núñez, UNAIDS

11:15 am: Stigma, the greatest hurdle to ending AIDS—  
Alexander Pastoors, Dutch Association of PLHIV, The  
Netherlands

**Lunch 12:00–1:00 pm**

#### **Expert Summit Session 7**

Chair: Thomas Quinn

1:00 pm: Ten-year retrospective on HIV capacity building  
in the Caribbean—Valerie Wilson, Trinidad

1:45 pm: What is the point? A cure without access—  
Edward Greene, United Nations

**Tea break 2:30–3:00 pm**

#### **Expert Summit Session 8**

Chair: Sten Vermund

3:00 pm: Care versus cure: different pathways for zika and  
HIV—Eric van Gorp, Rotterdam, Holland

3:45 pm: From care to cure: has the paradigm shifted?—  
Akin Abayomi, Cape Town, South Africa

**5:00 pm End of Day 2**

**Wednesday August 30, 2017**

#### **Caribbean Country Reports**

Chair: Valerie Wilson

**8.30–10.00 am**

**Coffee break 10:00–10:30 am**

#### **Caribbean country reports ... continued**

Chair: Valerie Wilson

**10.30–12.00 am**

**Lunch 12:00–1:00 pm**

#### **Research in the Caribbean**

Chair: Eddie Greene

1:00 pm: A Single Thread—Jamonn Roberts, Revolt Vi-  
suals, Barbados

1:30 pm NCDs in PLHIV, their Care and Treatment: a  
Public Health Concern—Carmeta Doughlin, The University  
of the West Indies, Barbados

2:00 pm: The Barbados Aging with HIV Study—Damani  
Piggott, Johns Hopkins University, Maryland

**Tea Break 2:30–3:00 pm**

3:00: Industry sponsored talks (not part of CME program):

Chair: Phil McCoy

Alere

Beckton Dickinson

Beckman Coulter

Roche—“The Challenges You Face Evolve. So Stay One  
Step Ahead”

Ryvex—“Accurate Results to treat opportunistic infections”  
Sismex

**4:30 pm: End of Day 3**

**Thursday August 31, 2017**

**Plenary Session: Violence and vulnerability of women in the Caribbean**

Chair: Kevin Robertson

8:30 am: “Governing” violence: language, “colonial” gender, and change—Hamilah DeShong, The University of the West Indies, Barbados

9:00 am: The personal experiences and opinions of the girls from the Government Industrial School of Barbados: a qualitative study—Jacoline Bergman, Rotterdam University, The Netherlands

9:30 am: Correlates of sex work stigma among female sex workers living with HIV in the Dominican Republic—Tahilin Karver, Johns Hopkins Bloomberg School of Public Health, Maryland

**Coffee break 10:00–10:30 am**

**Plenary Session: Research in Latin America and the Caribbean**

Chair: Brendan Bain

10:30 am: Guyana key population size estimation validation—Nastassia Rambarran, Society against sexual orientation discrimination, Guyana

11:00 am: Urbanization, the Built Environment, and the Sexual Geography of HIV/AIDS—Paul Burns, Washington

11:30 am: Adapting a multilevel intervention to promote HIV prevention, care, and treatment outcomes for Transgender

women sex workers in the Dominican Republic—Martha Perez, Unidad de Vacunas e Investigacion at Instituto Dermatologico y Cirugia de Piel, Dominican Republic

**Lunch 12:00–1:00 pm**

**Plenary Session: Research in Latin America and the Caribbean, continued**

Chair: Akin Abayomi

1:00 pm: Integrating substance use support and referral into a multilevel intervention for female sex workers living with HIV in the Dominican Republic—Hoisex Gomez, Unidad de Vacunas e Investigacion at Instituto Dermatologico y Cirugia de Piel, Dominican Republic

1:30 pm: “Son unas perras, eso es lo que dicen”: a qualitative study of sex work stigma among women living with HIV in the Dominican Republic—Clare Barrington, University of North Carolina

2:00 pm: Abriendo Puertas: Scaling up a multilevel intervention for female sex workers living with HIV in Santo Domingo, Dominican Republic—Yeycy Donastorg, Unidad de Vacunas e Investigacion at Instituto Dermatologico y Cirugia de Piel, Dominican Republic

**Tea break 2:30–3:00 pm**

3:00 pm: Review and the way forward—Brendan Bain, University Hospital of the West Indies, Jamaica

4:00 pm: End of Day 4
